# Supplementary material for: Phenyl lactic acid alleviatesHelicobacter pyloriinfection in C57BL/6 mice
Source: Royal Society of Chemistry journal article supplement (doi:10.1039/d3fo00099k), 2023-01-01
Supplement: d3fo00099k1.pdf [file d3fo00099k1.pdf]

## Supplementary Material

**Table S1 The cytotoxicity of PLA in AGS cells**

| Treatment  | Cell viability (%) |
|------------|--------------------|
| Control    | 100.00 ± 0.00      |
| PLA 5 µM   | 102.79 ± 1.77      |
| PLA 15 µM  | 102.16 ± 0.48      |
| PLA 25 µM  | 102.01 ± 1.84      |
| PLA 50 µM  | 100.92 ± 4.98      |
| PLA 100 µM | 99.04 ± 1.37       |
